# Supplementary material for: Moderate l-lactate administration suppresses adipose tissue macrophage M1 polarization to alleviate obesity-associated insulin resistance
Source: PubMed Central journal article supplement — J Biol Chem. 2022 Feb 24;298(4):101768. doi: 10.1016/j.jbc.2022.101768 (PMC8941214; doi:10.1016/j.jbc.2022.101768), 2022-02-24
Supplement: mmc1.pdf [file mmc1.pdf]

## Supplementary material

### **Moderate L-lactate administration suppresses adipose tissue macrophage M1 polarization to alleviate obesity-associated insulin resistance**

**Authors:** Hao Cai, Xin Wang, Zhixin Zhang, Juan Chen, Fangbin Wang, Lu Wang, Jian Liu\*

\* **Corresponding author:** Jian Liu

E-mail: [liujian509@hfut.edu.cn](mailto:liujian509@hfut.edu.cn)

The Supplemental material includes:

Fig. S1-10 (included in this file)

Table. S1-2 (included in this file)

**Figure S1. The insulin signaling cascades in the liver and skeletal muscle.** The 6-week-old male mice were divided into four groups, including LS, LL, HS, and HL groups. **A** The GLUT2 translocation in the liver and quantification of plasma membrane GLUT2 to total GLUT2; Immunoblots for phosphorylation level of AKT in the liver. **B** The GLUT4 translocation in the skeletal muscle and quantification of plasma membrane GLUT4 to total GLUT4; Immunoblots for phosphorylation level of AKT in the skeletal muscle. Data are presented as means  $\pm$  SD of 8 mice per group, one-way ANOVA with Mann-Whitney test; \* $p < 0.05$ , \*\* $p < 0.01$ , \*\*\* $p < 0.001$ . LS, LFD-saline (i.p.); LL, LFD-lactate (i.p.); HS, HFD-saline (i.p.); HL, HFD-lactate (i.p.); PM, Plasma membrane.

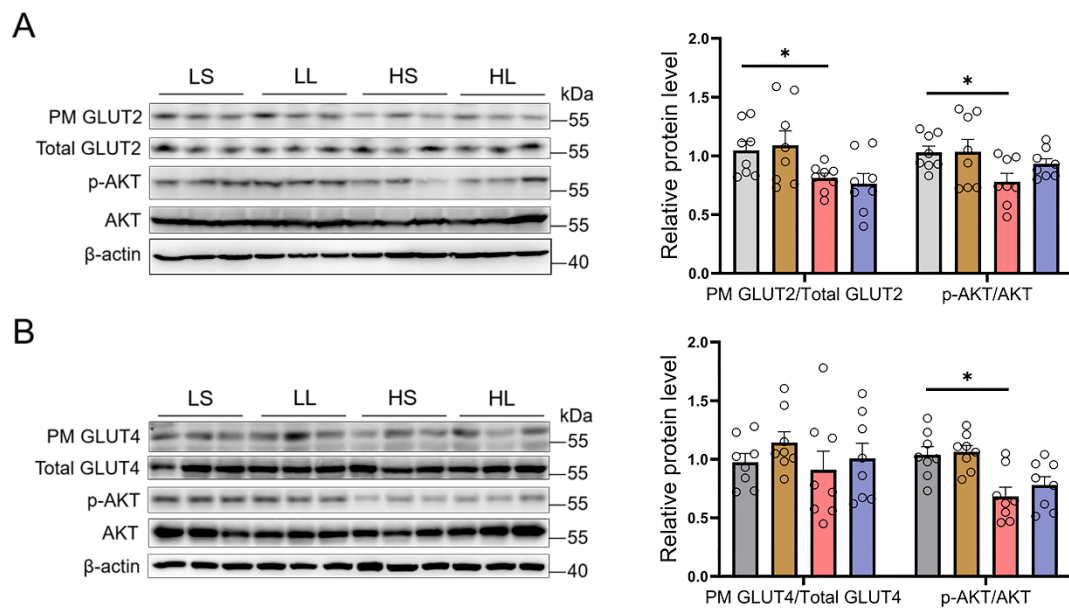

**Figure S2. Moderate L-lactate administration did not lead to the development of hyperlactatemia or lactic acidosis.** The 6-week-old male mice were divided into four groups, including LS, LL, HS, and HL groups. **A** The serum pH value. **B** Food intake. **C** Energy intake. **D** Liver weight. **E** Spleen weight. **F-G** The serum ALT (**F**) and AST (**G**). **H** The H&E staining of liver and spleen; scale bar, 100  $\mu$ m. Data are presented as means  $\pm$  SD of 8 mice per group, one-way ANOVA with Mann-Whitney test; \* $p < 0.05$ , \*\* $p < 0.01$ , \*\*\* $p < 0.001$ . LS, LFD-saline (i.p.); LL, LFD-lactate (i.p.); HS, HFD-saline (i.p.); HL, HFD-lactate (i.p.); ALT, Alanine transaminase; AST, Aspartate aminotransferase.

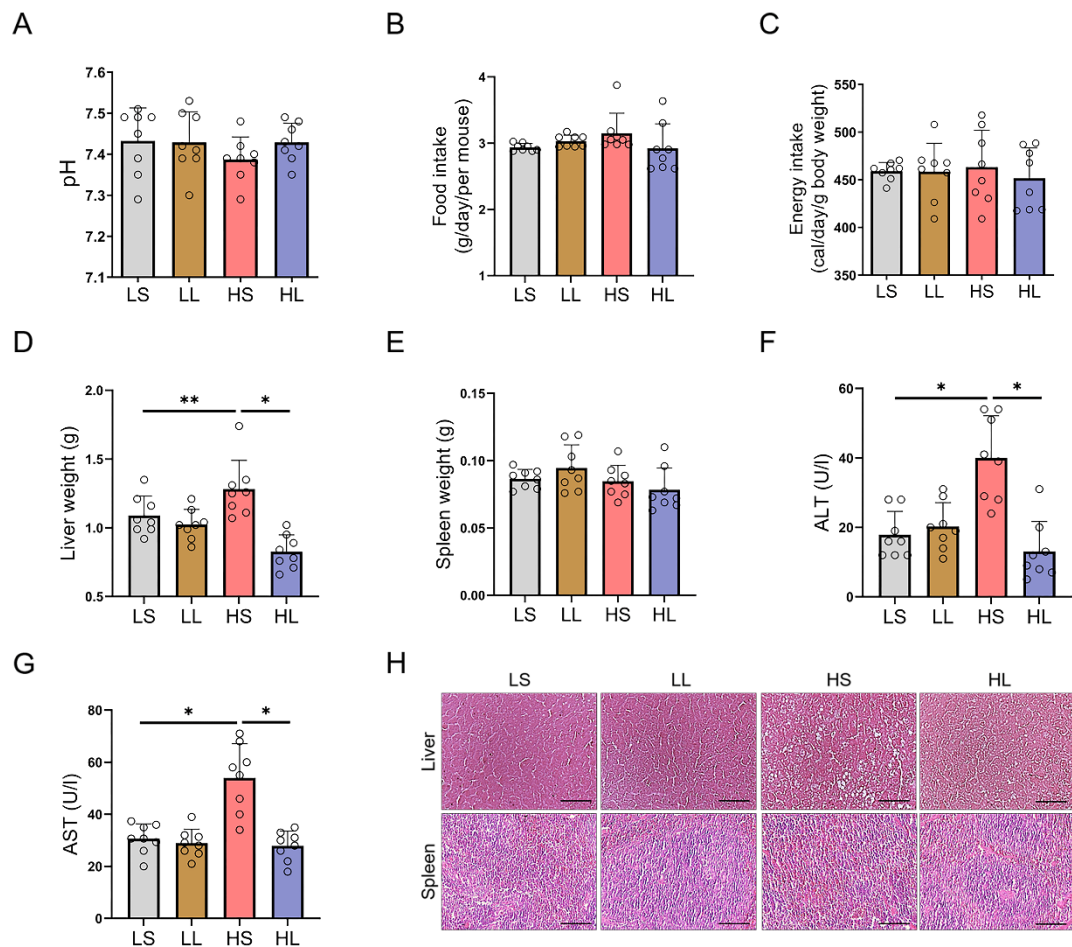

**Figure S3. The effects of moderate L-lactate administration on energy expenditure in LFD and HFD-fed mice.** At the age of 18 weeks, the metabolic capability in mice from four groups was measured. **A-B**  $VO_2$  (**A**) and  $VCO_2$  (**B**) per g body weight were detected without L-lactate injection during a 24-hour light-dark cycle. **C-D**  $VO_2$  (**C**) and  $VCO_2$  (**D**) per mouse were detected without L-lactate injection during a 24-h light-dark cycle. **E-F**  $VO_2$  (**E**) and  $VCO_2$  (**F**) per g body weight were detected during a 24-hour light-dark cycle and 400mg/kg L-lactate was injected at 9 a.m. and 6 p.m. Data are presented as means  $\pm$  SD of 8 mice per group, one-way ANOVA with Mann-Whitney test. \* $p < 0.05$ , \*\* $p < 0.01$ , \*\*\* $p < 0.001$  compared with HS group; # $p < 0.05$ , ## $p < 0.01$ , ### $p < 0.001$ , LL group was compared with LS group. LS, LFD-saline (i.p.); LL, LFD-lactate (i.p.); HS, HFD-saline (i.p.); HL, HFD-lactate (i.p.);  $VO_2$ , Oxygen consumption;  $VCO_2$ , Carbon dioxide production.

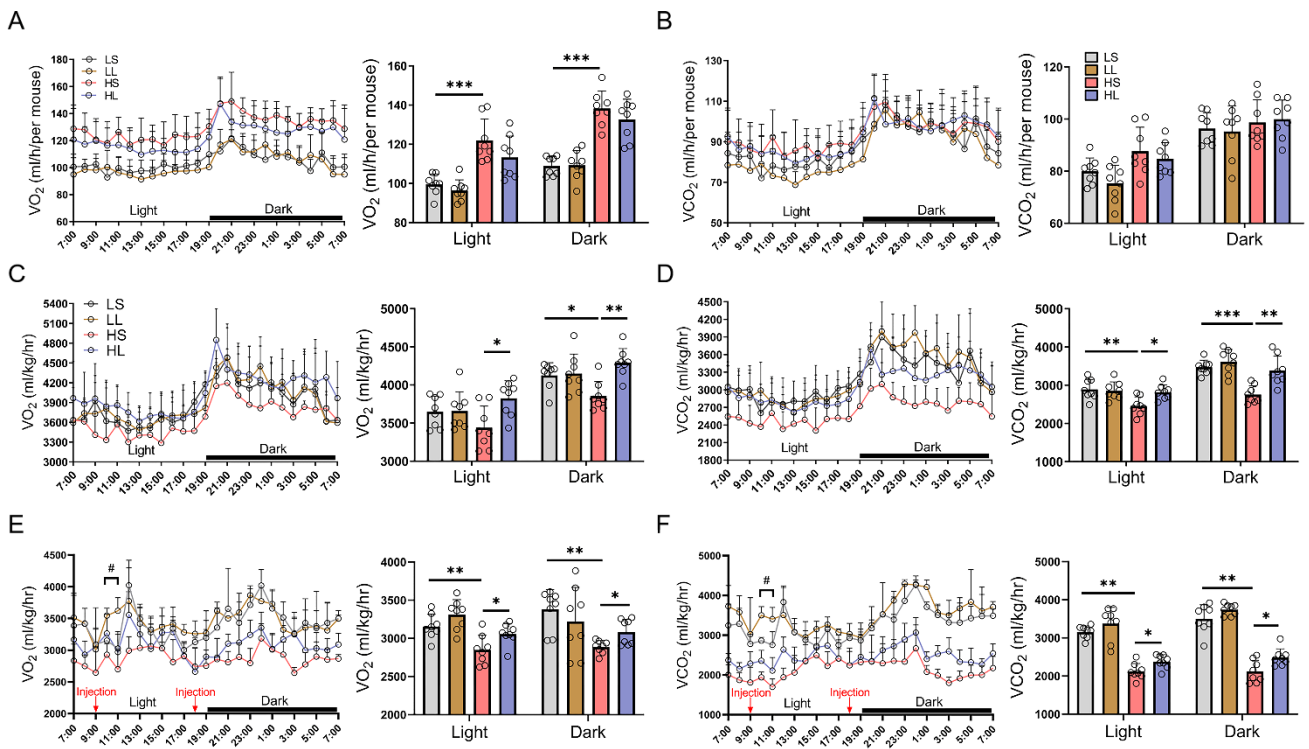

**Figure S4. The fatty acid oxidation and glucose catabolism in the liver and skeletal muscle.** The 6-week-old male mice were divided into four groups, including LS, LL, HS, and HL groups. **A-B** The relative genes of fatty acid oxidation and glucose catabolism in the liver (**A**) and skeletal muscle (**B**). Data are presented as means  $\pm$  SD of 8 mice per group, one-way ANOVA with Mann-Whitney test; \* $p < 0.05$ , \*\* $p < 0.01$ , \*\*\* $p < 0.001$ . LS, LFD-saline (i.p.); LL, LFD-lactate (i.p.); HS, HFD-saline (i.p.); HL, HFD-lactate (i.p.).

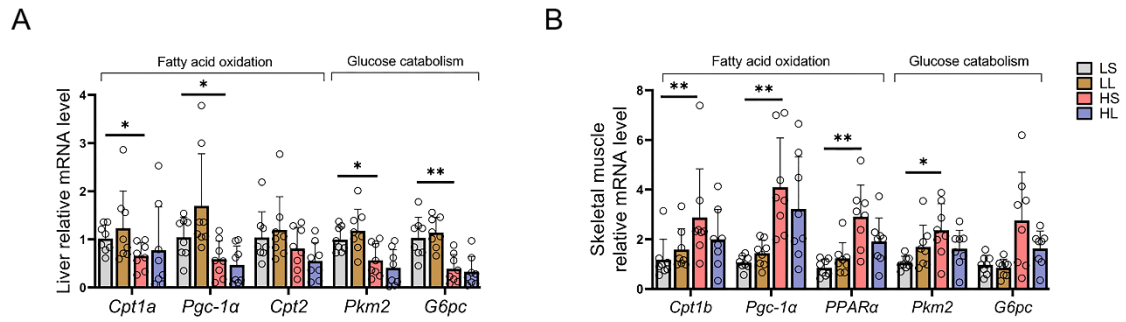

**Figure S5. The expression of MCT1 in ATMs and BMDMs after inflammatory stimulation.** The 6-week-old male mice were divided into four groups, including LS, LL, HS, and HL groups. **A** The mRNA level of *MCT1* in EATs. **B** The mRNA level of *MCT1* in ATMs from EATs. BMDMs were treated with vehicle or L-lactate (5 mM or 10 mM), and then LPS was added. **C** The mRNA level of *MCT1* in BMDMs. Data are presented as means  $\pm$  SD of 8 mice per group in vivo, 4 parallel cell samples per group in ATMs and 6 parallel cell samples per group in BMDMs, one-way ANOVA with Mann-Whitney test for mice and two-tailed Student's t-test for cell samples; \* $p < 0.05$ , \*\* $p < 0.01$ , \*\*\* $p < 0.001$ . LS, LFD-saline (i.p.); LL, LFD-lactate (i.p.); HS, HFD-saline (i.p.); HL, HFD-lactate (i.p.); Lac, Lactate; EAT, Epididymal adipose tissue; ATM, Adipose tissue macrophage.

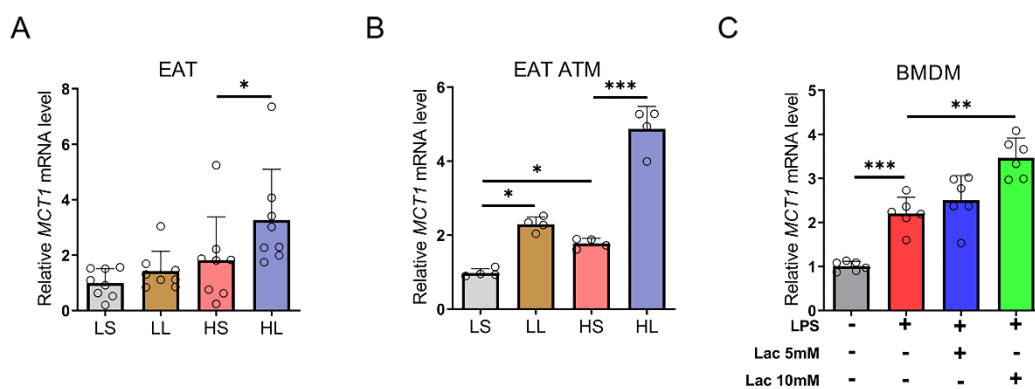

**Figure S6. The expression of GPR132 in adipocytes and SVFs.** **A** The mRNA level of *GPR132* in adipocytes and SVFs from EATs in HFD-fed mice. **B** The mRNA level of *GPR132* in primary adipocytes after L-lactate treatment. **C** The mRNA level of *GPR132* in SVFs after L-lactate treatment. Data are presented as means  $\pm$  SD of 4 parallel samples per group, one-way ANOVA with Mann-Whitney test for mice and two-tailed Student's t-test for cell samples; \* $p < 0.05$ , \*\* $p < 0.01$ , \*\*\* $p < 0.001$ .

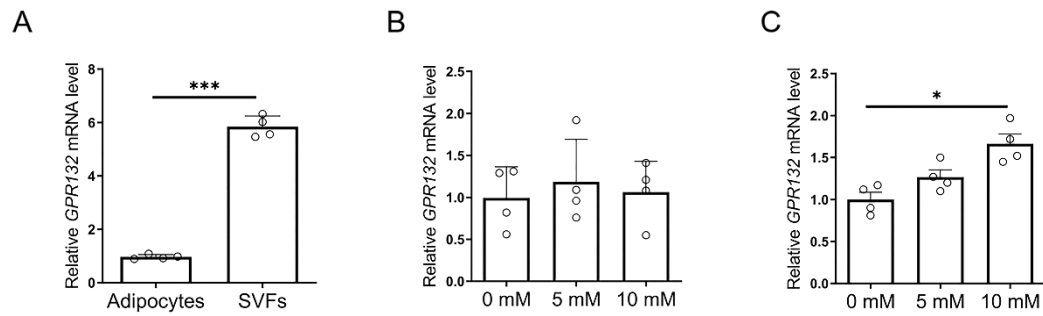

**Figure S7. siRNA-mediated knockdown of GPR132 in BMDMs.** BMDMs were transfected with a negative control siRNA or a siRNA targeting GPR132 for 48 h and lysed for immunoblots. Immunoblots for GPR132 in BMDMs and quantification of GPR132 to  $\beta$ -actin. Data are presented as means  $\pm$  SD of 4 parallel samples per group, two-tailed Student's t-test; \* $p < 0.05$ , \*\* $p < 0.01$ , \*\*\* $p < 0.001$ .

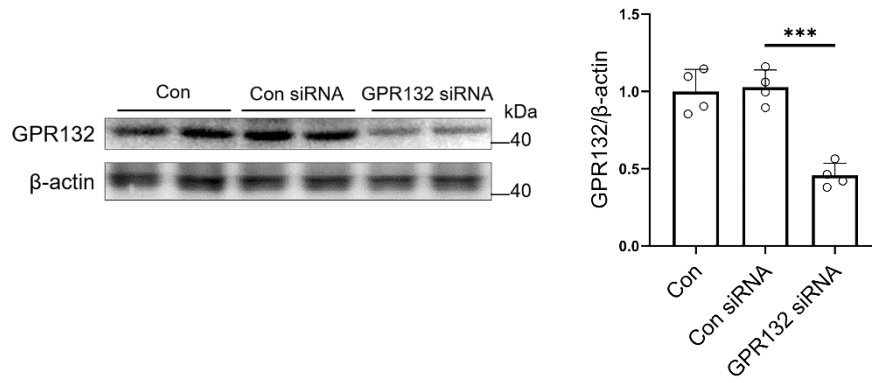



**Figure S8. GPR132-PKA participated in the inhibition of L-lactate on macrophage M1 polarization.** BMDMs were treated with vehicle, L-lactate, Con siRNA, or GPR132 siRNA, and then LPS was added. **A-B** Flow cytometry analyses of M1 surface marker CD38 (**A**) and CD274 (**B**). **C** The mRNA levels of pro-inflammatory genes. In another independent study, BMDMs were treated with vehicle or L-lactate, and then LPS was added. H89 was used as a PKA inhibitor. **D-E** Flow cytometry analyses of M1 surface marker CD38 (**D**) and CD274 (**E**). **F** The mRNA levels of pro-inflammatory genes. Data are presented as means  $\pm$  SD of 4 parallel samples per group, two-tailed Student's t-test; \* $p < 0.05$ , \*\* $p < 0.01$ , \*\*\* $p < 0.001$ . Lac, L-lactate.

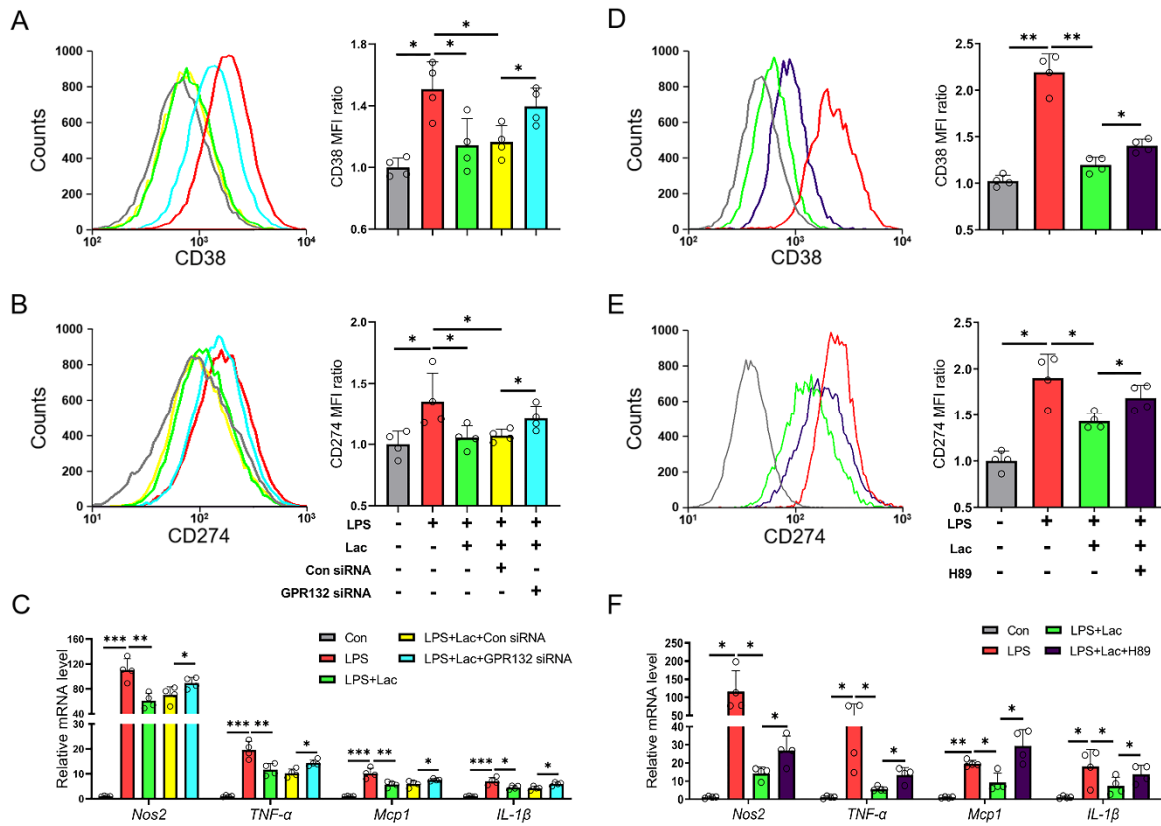

**Figure S9. The expression of TGF- $\beta$ 1 and TGF- $\beta$ 2 in EATs.** The 6-week-old male mice were divided into four groups, including LS, LL, HS, and HL groups. **A-B** The mRNA levels of *TGF- $\beta$ 1* (**A**) and *TGF- $\beta$ 2* (**B**). **C** Immunoblots for TGF- $\beta$ 1 and TGF- $\beta$ 2 in EATs and quantification of TGF- $\beta$ 1 and TGF- $\beta$ 2 to  $\beta$ -actin. Data are presented as means  $\pm$  SD of 8 mice per group, one-way ANOVA with Mann-Whitney test; \* $p$  < 0.05, \*\* $p$  < 0.01, \*\*\* $p$  < 0.001. LS, LFD-saline (i.p.); LL, LFD-lactate (i.p.); HS, HFD-saline (i.p.); HL, HFD-lactate (i.p.).

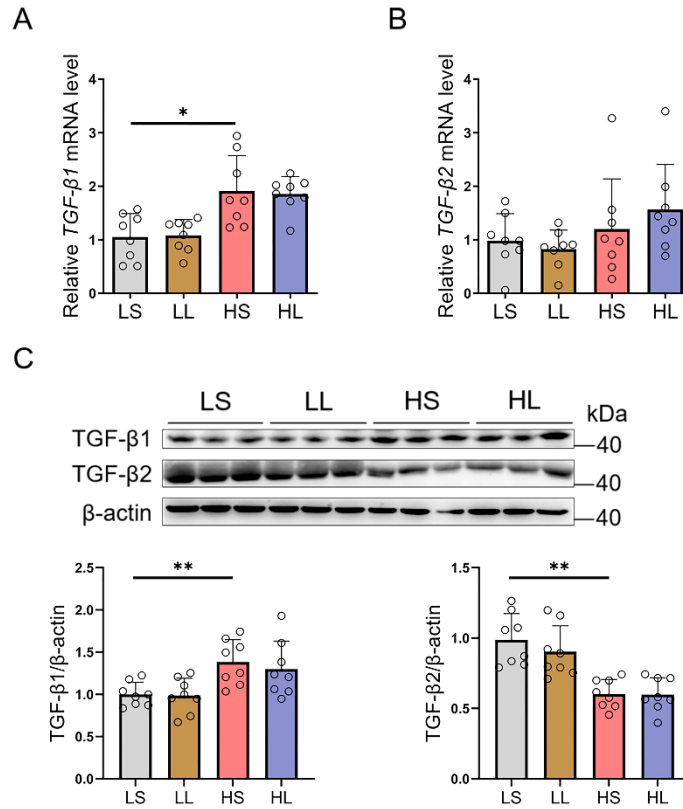

**Figure S10. The proposed mechanism for moderate L-lactate administration improves adipose tissue insulin resistance.** On the one hand, moderate L-lactate administration elevates adipose tissue mitochondrial thermogenic protein UCP1 expression. On the other hand, L-lactate could bind to the GPR132 on the membrane of macrophages and activates the downstream PKA-LKB1-AMPK $\alpha$ 1 signal, which subsequently inhibits the NF- $\kappa$ B signal and the secretion of inflammatory cytokines. The suppression of moderate L-lactate administration on macrophage pro-inflammatory M1 polarization further promotes AKT phosphorylation and GLUT4 translocation in adipocytes. Collectively, moderate L-lactate administration activates adipose tissue macrophage GPR132-PKA-AMPK $\alpha$ 1 pathway to alleviate obesity-associated insulin resistance in mice.

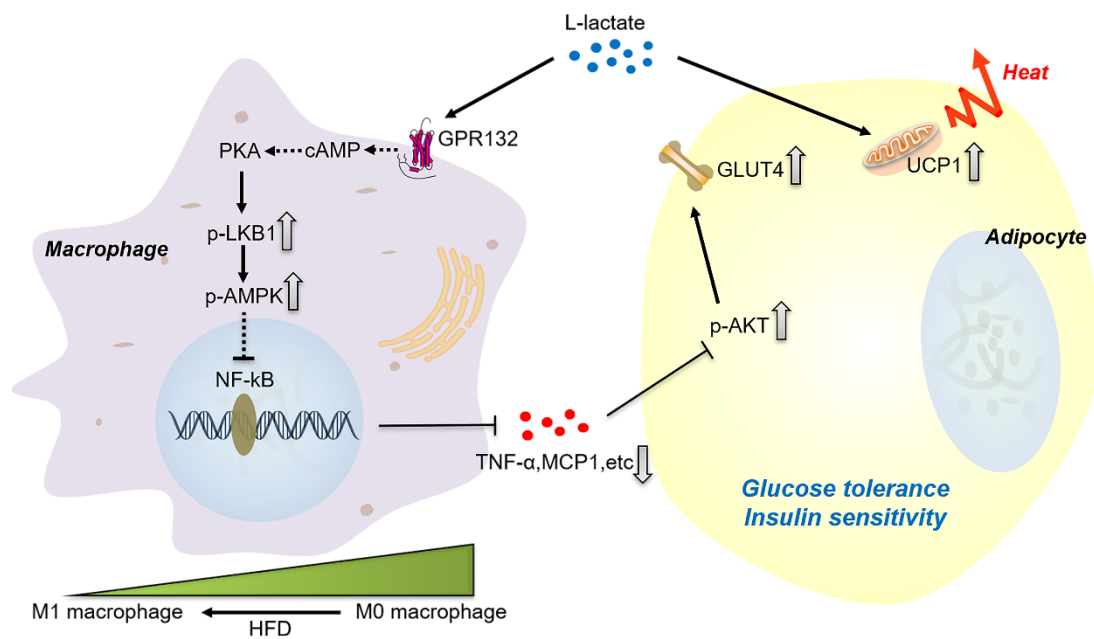

**Table S1.** The primer sequences used for qRT-PCR.

| Gene           | Forward primer            | Reverse primer          |
|----------------|---------------------------|-------------------------|
| <i>β-actin</i> | CATCCGTAAAGACCTCTATGCCAAC | ATGGAGCCACCGATCCACA     |
| <i>TNF-α</i>   | ACGGCATGGATCTCAAAGAC      | AGATAGCAAATCGGCTGACG    |
| <i>IL-1β</i>   | CTTCCCAGGGCATGTTAAG       | ACCCTGAGCGACCTGTCTTG    |
| <i>IFN-γ</i>   | ATGAACGCTACACACTGCATC     | CCATCCTTTTGCCAGTTCCTC   |
| <i>MCP1</i>    | CCCCAAGAAGGAATGGGTCC      | GGTTGTGGAAAAGGTAGTGG    |
| <i>F4/80</i>   | TGACTCACCTTGTGGTCCTAA     | CTTCCCAGAATCCAGTCTTTCC  |
| <i>Nos2</i>    | CCAAGCCCTCACCTACTTCC      | CTCTGAGGGCTGACACAAGG    |
| <i>Arg1</i>    | CTCCAAGCCAAAGTCCTTAGAG    | AGGAGCTGTCATTAGGGACATC  |
| <i>Ucp1</i>    | CACTCAGGATTGGCCTCTACG     | GGGGTTTGATCCCATGCAGA    |
| <i>Prdm16</i>  | CCACCAGACTTCGAGCTACG      | ACACCTCTGTATCCGTCAGCA   |
| <i>Pgc-1α</i>  | CCCTGCCATTGTTAAGACC       | TGCTGCTGTTCTGTTTTTC     |
| <i>Cidea</i>   | TGACATTCATGGGATTGCAGAC    | GGCCAGTTGTGATGACTAAGAC  |
| <i>GPR132</i>  | GTGCCATTGTGGATCATCTACA    | CTCTCCAGTGCATAGACCACG   |
| <i>MCT1</i>    | TGTTAGTCGGAGCCTTCATTTC    | CACTGGTCGTTGCACTGAATA   |
| <i>TGF-β1</i>  | CTCCCGTGGCTTCTAGTGC       | GCCTTAGTTTGGACAGGATCTG  |
| <i>TGF-β2</i>  | CTTCGACGTGACAGACGCT       | GCAGGGGCAGTGTAAACTTATT  |
| <i>Cpt1a</i>   | CTCCGCCTGAGCCATGAAG       | CACCAGTGATGATGCCATTCT   |
| <i>Cpt2</i>    | CAGCACAGCATCGTACCCA       | TCCCAATGCCGTTCTCAAAT    |
| <i>Pkm2</i>    | GCCGCCTGGACATTGACTC       | CCATGAGAGAAATTCAGCCGAG  |
| <i>G6pc</i>    | CGACTCGCTATCTCCAAGTGA     | GTTGAACCAGTCTCCGACCA    |
| <i>CPT1b</i>   | GCACACCAGGCAGTAGCTTT      | CAGGAGTTGATTCCAGACAGGTA |
| <i>PPARα</i>   | AGAGCCCCATCTGTCTCTC       | ACTGGTAGTCTGCAAAACCAA   |

**Table S2.** The antibodies used in this study.

|                       | <b>Antibody</b>          | <b>Source</b>             | <b>Catalog number</b> | <b>Dilution</b> |
|-----------------------|--------------------------|---------------------------|-----------------------|-----------------|
| <b>Western blot</b>   | $\beta$ -actin           | Cell Signaling Technology | 4967                  | 5000            |
|                       | AKT                      | Cell Signaling Technology | 4691S                 | 5000            |
|                       | Phosphor-AKT             | Cell Signaling Technology | 9271S                 | 1000            |
|                       | AMPK $\alpha$ 1          | Cell Signaling Technology | 2532S                 | 1000            |
|                       | Phosphor-AMPK $\alpha$ 1 | Cell Signaling Technology | 2531S                 | 1000            |
|                       | LKB1                     | Cell Signaling Technology | 3047                  | 1000            |
|                       | Phosphor-LKB1            | Cell Signaling Technology | 3482                  | 1000            |
|                       | UCP1                     | Abcam                     | ab209483              | 5000            |
|                       | TGF- $\beta$ 1           | Abcam                     | ab215715              | 1000            |
|                       | TGF- $\beta$ 2           | Abcam                     | ab36495               | 1000            |
|                       | GPR132                   | Santa                     | sc-137112             | 200             |
|                       | GLUT2                    | Proteintech               | 66889-1-Ig            | 5000            |
|                       | GLUT4                    | Millipore                 | 07-1404               | 1000            |
| <b>Flow cytometry</b> | APC anti-mouse F4/80     | BioLegend                 | 123116                | 200             |
|                       | FITC anti-mouse CD206    | BioLegend                 | 141704                | 300             |
|                       | PE anti-mouse CD11c      | eBioscience               | 12-0114               | 200             |
|                       | APC anti-mouse CD274     | BioLegend                 | 124312                | 200             |
|                       | PE anti-mouse CD38       | BioLegend                 | 102708                | 200             |
